# Supplementary material
Source: Springer Nature journal article supplement (https://www.springermedizin.de/resource/supplementary/12967_2013_1527_MOESM1_ESM.pdf/9574262)

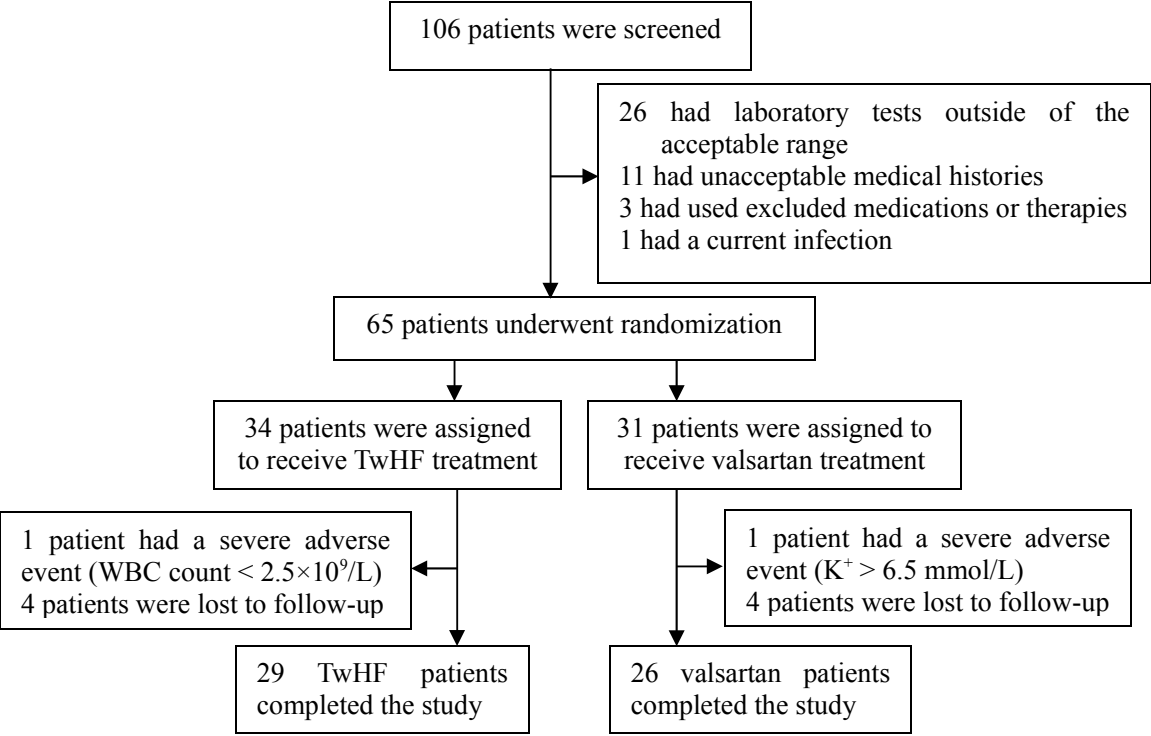

Supplement: MOESM1 [file 9574262]
